# Supplementary material for: Apelin inhibition prevents resistance and metastasis associated with anti‐angiogenic therapy
Source: PubMed Central journal article supplement (PMC6685079; doi:10.15252/emmm.201809266), 2019-06-24
Supplement: EMMM-11-e9266-s001.pdf [file EMMM-11-e9266-s001.pdf]

# Appendix

**1.) Appendix Figures S1-S3**

**2.) Appendix Figure Legends S1-S3**

**3.) Appendix Table S1**

# Appendix Figure S1

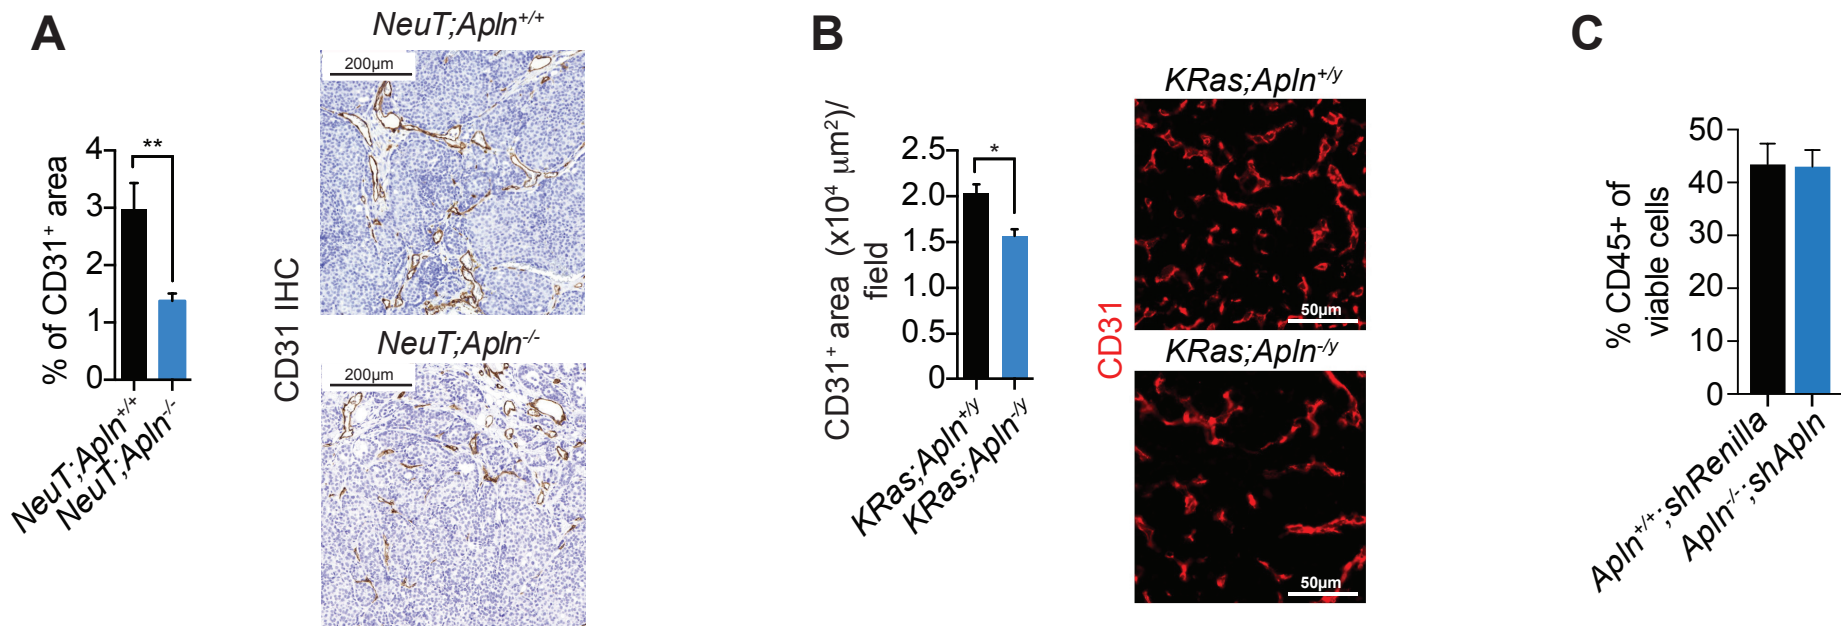

# Appendix Figure S2

**A**

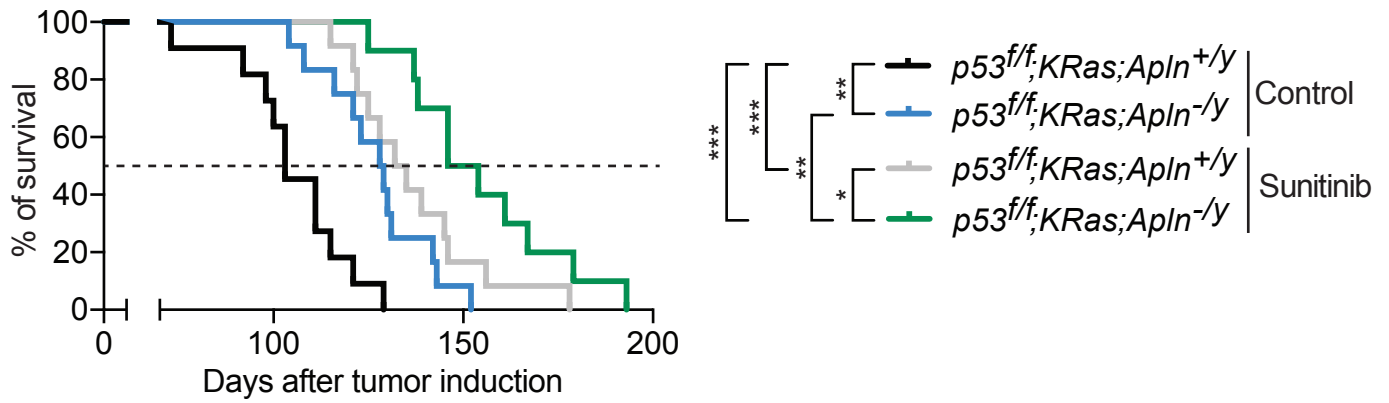

**B**

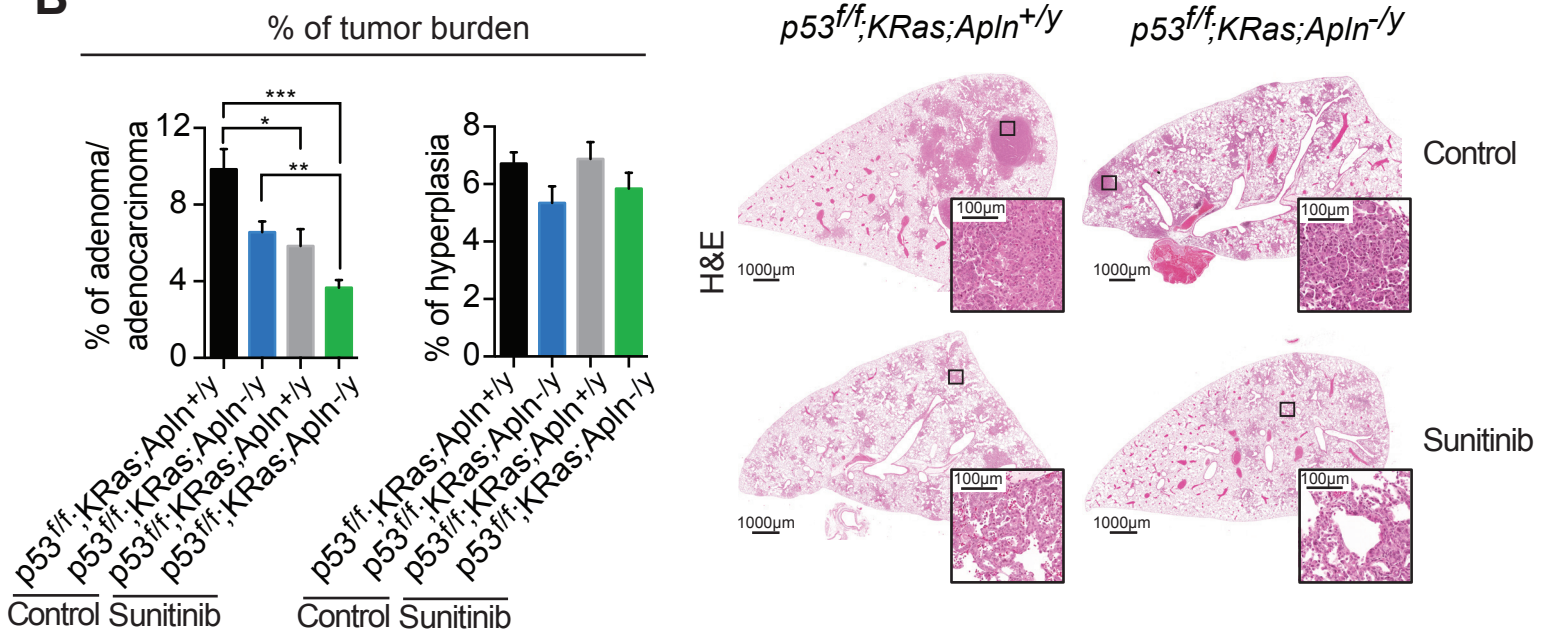

**C**

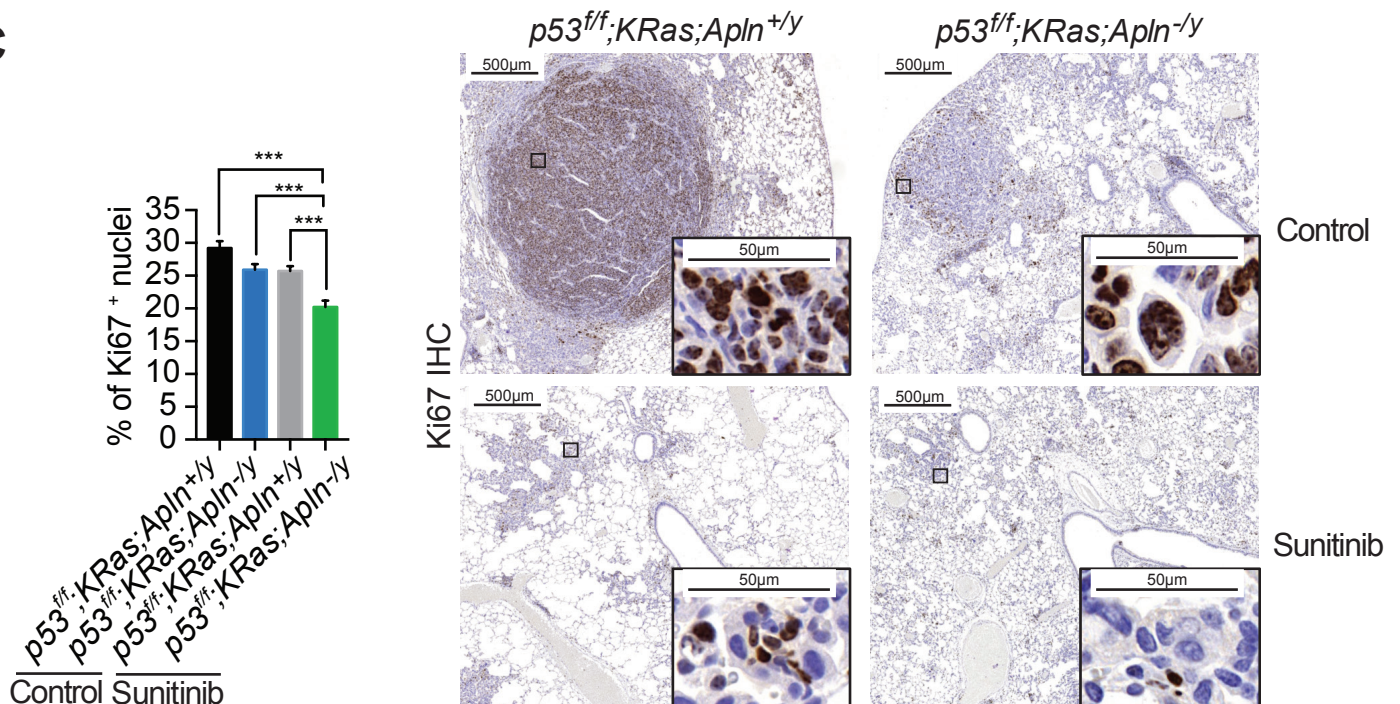

# Appendix Figure S3

**A**

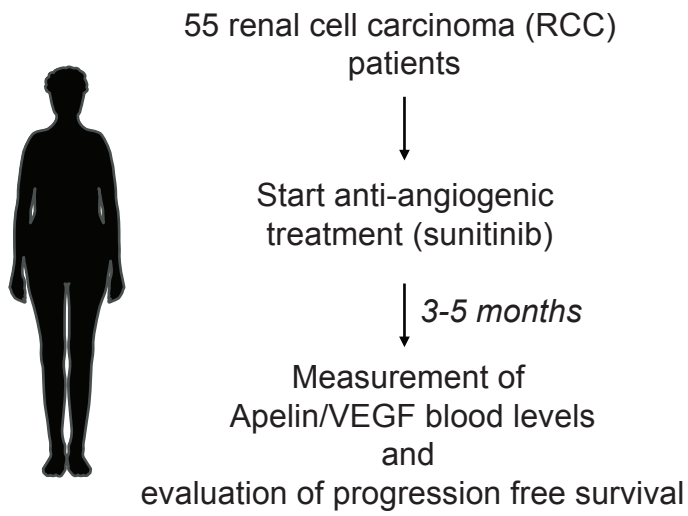

**B**

| Cox regression model                                              |        |             |         |
|-------------------------------------------------------------------|--------|-------------|---------|
| Characteristics                                                   | Exp(B) | 95% CI      | P-value |
| Age in years (<60 vs ≥60)                                         | 0.680  | 0.383-1.208 | 0.188   |
| Gender (male vs female)                                           | 1.171  | 0.558-2.456 | 0.676   |
| T1+T2 vs T3+T4                                                    | 0.544  | 0.302-0.981 | 0.043   |
| Serum APLN level (low vs high)                                    | 1.665  | 0.849-3.263 | 0.138   |
| <b>Abbreviations:</b> Exp(B), odds ratio; CI, confidence interval |        |             |         |



## Appendix Figure Legends S1-S3

### Appendix S1 – Targeting Apelin reduces angiogenesis in mammary and lung cancer.

(A) Mean percentages of CD31<sup>+</sup> area ( $\pm$  S.E.M.) in *NeuT;Apln<sup>+/+</sup>* (n=3) and *NeuT;Apln<sup>-/-</sup>* (n=6) mice, 4 weeks after mammary tumor onset. \*\*P<0.01; t test. Right panels show representative immunohistochemical anti-CD31 staining. Scale bars = 200  $\mu$ m. (B) CD31-positive areas ( $\times 10^4 \mu\text{m}^2$ )/field in lung tumors of *KRas;Apln<sup>+/-</sup>* (n=4) and *KRas;Apln<sup>-/-</sup>* (n=4) mice 18 weeks after AdenoCre inhalation. \*P<0.05; t test; three sections per lung were analysed. Right panels show representative anti-CD31 staining. Scale bars = 50  $\mu$ m. (C) Mean percentage ( $\pm$  S.E.M.) of CD45<sup>+</sup> tumor-infiltrating immune cells normalized to viable cell count, evaluated by FACS from digested mammary tumors. E0771 *shRenilla* (n=8) or *shApln* (n=6) were orthotopically injected into C57BL/6J *Apln<sup>+/+</sup>* or *Apln<sup>-/-</sup>* mice, respectively and tumors were harvested at day 25 post-injection.

### Appendix S2 – Apelin-depletion in combination with sunitinib treatment mitigates KRas-driven lung cancer.

(A) Kaplan Meier survival plot of *p53<sup>ff</sup>;KRas;Apln<sup>+/-</sup>* and *p53<sup>ff</sup>;KRas;Apln<sup>-/-</sup>* mice with non-small lung cancer (NSCLC), either left untreated (control) or treated with sunitinib (60mg/kg, three times per week) after tumor onset. *p53<sup>ff</sup>;KRas;Apln<sup>+/-</sup>* Control (n=11), *p53<sup>ff</sup>;KRas;Apln<sup>-/-</sup>* Control (n=12), *p53<sup>ff</sup>;KRas;Apln<sup>+/-</sup>* Sunitinib (n=12), *p53<sup>ff</sup>;KRas;Apln<sup>-/-</sup>* Sunitinib (n=10); \*P<0.05; \*\*P<0.01; \*\*\*P<0.001; Log rank test. The dotted line indicates 50% survival. (B) Percentages of adenoma/adenocarcinoma and hyperplasia in age-matched *p53<sup>ff</sup>;KRas;Apln<sup>+/-</sup>* and *p53<sup>ff</sup>;KRas;Apln<sup>-/-</sup>* lungs 8 weeks after adenoCre inhalation, either left untreated (control) or treated with sunitinib (60mg/kg, three times per week). Data are shown as mean values  $\pm$  S.E.M. *p53<sup>ff</sup>;KRas;Apln<sup>+/-</sup>* Control (n=9) and *p53<sup>ff</sup>;KRas;Apln<sup>-/-</sup>* Control (n=7), *p53<sup>ff</sup>;KRas;Apln<sup>+/-</sup>* Sunitinib (n=7) and *p53<sup>ff</sup>;KRas;Apln<sup>-/-</sup>* Sunitinib (n=7); three sections per lung were analysed; \*P<0.05; \*\*P<0.01; \*\*\*P<0.001; Kruskal-Wallis test. Right panels show representative H&E

images. Insets show higher magnifications of lung tumors. Scale bars = 1000  $\mu\text{m}$  (large panels) and 100  $\mu\text{m}$  (insets). **(C)** Ki67 immunohistochemistry of age-matched *p53<sup>ff</sup>;KRas;Apln<sup>+/-</sup>* and *p53<sup>ff</sup>;KRas;Apln<sup>-/-</sup>* lungs tumors 8 weeks after adenoCre inhalation, left untreated (control) or treated with sunitinib (60mg/kg, three times per week). Data are shown as mean values  $\pm$  S.E.M. *p53<sup>ff</sup>;KRas;Apln<sup>+/-</sup>* Control (n=8), *p53<sup>ff</sup>;KRas;Apln<sup>-/-</sup>* Control (n=8), *p53<sup>ff</sup>;KRas;Apln<sup>+/-</sup>* Sunitinib (n=9) and *p53<sup>ff</sup>;KRas;Apln<sup>-/-</sup>* Sunitinib (n=7); three sections per lung were analysed; \*\*\*P<0.001; Kruskal-Wallis test. Right panels show representative Ki67 intra-tumoral stainings. Scale bars = 500  $\mu\text{m}$  (large panels) and 50  $\mu\text{m}$  (insets).

### **Appendix S3 - Multivariate analysis of patients treated with sunitinib therapy.**

**(A)** Experimental set up for clinical study in RCC (renal cell carcinoma) patients and non-small cell lung cancer patients that received sunitinib or bevacizumab anti-angiogenic therapy, respectively.

**(B)** Multivariate analysis of data from RCC patients 3-5 months after the start date of sunitinib treatment; complementary to data in Figure 7C.

| <b>Appendix Table S1</b> |                                                                             |                |
|--------------------------|-----------------------------------------------------------------------------|----------------|
| <b>Figure</b>            | <b>Comparison</b>                                                           | <b>p-value</b> |
| Figure 1A                | NeuT;Apln <sup>+/+</sup> vs. NeuT;Apln <sup>-/-</sup>                       | 0.0185         |
| Figure 1B                | Apln <sup>+/+</sup> shRen vs. Apln <sup>-/-</sup> shApln; Day 17            | <0.0001        |
|                          | Apln <sup>+/+</sup> shRen vs. Apln <sup>+/+</sup> shApln; Day 20            | 0.0081         |
|                          | Apln <sup>+/+</sup> shRen vs. Apln <sup>-/-</sup> shRen; Day 20             | 0.0076         |
|                          | Apln <sup>+/+</sup> shRen vs. Apln <sup>-/-</sup> shApln; Day 20            | <0.0001        |
|                          | Apln <sup>+/+</sup> shApln vs. Apln <sup>-/-</sup> shApln; Day 20           | 0.0004         |
|                          | Apln <sup>-/-</sup> shRen vs. Apln <sup>-/-</sup> shApln; Day 20            | 0.0018         |
| Figure 1C                | Apln <sup>+/+</sup> shRen vs. Apln <sup>-/-</sup> shApln                    | 0.0040         |
| Figure 1D                | Apln <sup>+/+</sup> shRen vs. Apln <sup>-/-</sup> shApln                    | 0.0013         |
| Figure 1E                | Apln <sup>+/+</sup> shRen vs. Apln <sup>+/+</sup> shApln                    | 0.0379         |
| Figure 1F                | Apln <sup>+/+</sup> shRen vs. Apln <sup>-/-</sup> shApln; PMN-MDSC          | 0.0015         |
|                          | Apln <sup>+/+</sup> shRen vs. Apln <sup>-/-</sup> shApln; NKT               | 0.0234         |
| Figure 2B                | Apln GO vs. Apln STOP; Day 6                                                | 0.0032         |
|                          | Apln GO vs. Apln STOP; Day 8                                                | <0.0001        |
|                          | Apln GO vs. Apln STOP; Day 10                                               | <0.0001        |
|                          | Apln GO vs. Apln STOP; Day 11                                               | <0.0001        |
| Figure 3A                | NeuT;Apln <sup>+/+</sup> Ctrl vs. NeuT;Apln <sup>+/+</sup> Sut              | 0.0158         |
|                          | NeuT;Apln <sup>+/+</sup> Ctrl vs. NeuT;Apln <sup>-/-</sup> Ctrl             | 0.0153         |
|                          | NeuT;Apln <sup>+/+</sup> Ctrl vs. NeuT;Apln <sup>-/-</sup> Sut              | 0.0001         |
|                          | NeuT;Apln <sup>-/-</sup> Ctrl vs. NeuT;Apln <sup>-/-</sup> Sut              | 0.0339         |
|                          | NeuT;Apln <sup>+/+</sup> Sut vs. NeuT;Apln <sup>-/-</sup> Sut               | 0.0251         |
| Figure 3B                | NeuT;Apln <sup>+/+</sup> Ctrl vs. NeuT;Apln <sup>-/-</sup> Ctrl             | 0.0112         |
|                          | NeuT;Apln <sup>+/+</sup> Sut vs. NeuT;Apln <sup>-/-</sup> Sut               | 0.0476         |
|                          | NeuT;Apln <sup>+/+</sup> Ctrl vs. NeuT;Apln <sup>-/-</sup> Sut              | 0.0002         |
| Figure 3D                | NeuT;Apln <sup>-/-</sup> Ctrl vs. NeuT;Apln <sup>-/-</sup> Sut              | 0.0431         |
|                          | NeuT;Apln <sup>+/+</sup> Sut vs. NeuT;Apln <sup>-/-</sup> Sut               | 0.0102         |
| Figure 3E                | Control vs. MM54; Day 18                                                    | 0.0120         |
|                          | Control vs. Sunitinib; Day 18                                               | 0.0374         |
|                          | Control vs. Sunitinib+MM54; Day 18                                          | 0.0019         |
|                          | Control vs. MM54; Day 21                                                    | 0.0002         |
|                          | Control vs. Sunitinib; Day 21                                               | <0.0001        |
|                          | Control vs. Sunitinib+MM54; Day 21                                          | <0.0001        |
|                          | MM54 vs. Sunitinib+MM54; Day 25                                             | 0.0011         |
|                          | Sunitinib vs. Sunitinib+MM54; Day 25                                        | 0.0337         |
| Figure 4C                | NeuT;Apln <sup>+/+</sup> Ctrl vs. NeuT;Apln <sup>-/-</sup> Sut; 2 weeks     | 0.0089         |
|                          | NeuT;Apln <sup>+/+</sup> Ctrl vs. NeuT;Apln <sup>+/+</sup> Sut; 4 weeks     | 0.0056         |
|                          | NeuT;Apln <sup>+/+</sup> Ctrl vs. NeuT;Apln <sup>-/-</sup> Sut; 4 weeks     | 0.0007         |
|                          | NeuT;Apln <sup>-/-</sup> Ctrl vs. NeuT;Apln <sup>-/-</sup> Sut; 2 weeks     | 0.0217         |
| Figure 4D                | NeuT;Apln <sup>+/+</sup> Ctrl vs. NeuT;Apln <sup>+/+</sup> Sut; CD31        | 0.0043         |
|                          | NeuT;Apln <sup>+/+</sup> Ctrl vs. NeuT;Apln <sup>-/-</sup> Sut; CD31        | <0.0001        |
|                          | NeuT;Apln <sup>-/-</sup> Ctrl vs. NeuT;Apln <sup>-/-</sup> Sut; CD31        | 0.0439         |
|                          | NeuT;Apln <sup>+/+</sup> Ctrl vs. NeuT;Apln <sup>-/-</sup> Sut; Dil. Vessel | 0.0100         |

|             |                                                                                      |         |
|-------------|--------------------------------------------------------------------------------------|---------|
|             | NeuT;Apln <sup>-/-</sup> Ctrl vs. NeuT;Apln <sup>-/-</sup> Sut; Dil. Vessel          | 0.0034  |
|             | NeuT;Apln <sup>+/+</sup> Ctrl vs. NeuT;Apln <sup>+/+</sup> Sut; CD31/ $\alpha$ -SMA  | <0.0001 |
|             | NeuT;Apln <sup>+/+</sup> Ctrl vs. NeuT;Apln <sup>-/-</sup> Ctrl; CD31/ $\alpha$ -SMA | <0.0001 |
|             | NeuT;Apln <sup>+/+</sup> Ctrl vs. NeuT;Apln <sup>-/-</sup> Sut; CD31/ $\alpha$ -SMA  | <0.0001 |
|             | NeuT;Apln <sup>-/-</sup> Ctrl vs. NeuT;Apln <sup>+/+</sup> Sut; CD31/ $\alpha$ -SMA  | <0.0001 |
|             | NeuT;Apln <sup>-/-</sup> Ctrl vs. NeuT;Apln <sup>-/-</sup> Sut; CD31/ $\alpha$ -SMA  | <0.0001 |
|             | NeuT;Apln <sup>+/+</sup> Sut vs. NeuT;Apln <sup>-/-</sup> Sut; CD31/ $\alpha$ -SMA   | <0.0001 |
| Figure 5A   | NeuT;Apln <sup>+/+</sup> Ctrl vs. NeuT;Apln <sup>+/+</sup> Sut                       | <0.0001 |
|             | NeuT;Apln <sup>+/+</sup> Ctrl vs. NeuT;Apln <sup>-/-</sup> Sut                       | <0.0001 |
|             | NeuT;Apln <sup>-/-</sup> Ctrl vs. NeuT;Apln <sup>+/+</sup> Sut                       | <0.0001 |
|             | NeuT;Apln <sup>-/-</sup> Ctrl vs. NeuT;Apln <sup>-/-</sup> Sut                       | <0.0001 |
|             | NeuT;Apln <sup>+/+</sup> Sut vs. NeuT;Apln <sup>-/-</sup> Sut                        | <0.0001 |
| Figure 5C   | NeuT;Apln <sup>+/+</sup> Ctrl vs. NeuT;Apln <sup>-/-</sup> Ctrl; 4 weeks             | <0.0001 |
|             | NeuT;Apln <sup>+/+</sup> Ctrl vs. NeuT;Apln <sup>-/-</sup> Sut; 4 weeks              | <0.0001 |
|             | NeuT;Apln <sup>+/+</sup> Sut vs. NeuT;Apln <sup>-/-</sup> Ctrl; 4 weeks              | 0.0351  |
|             | NeuT;Apln <sup>+/+</sup> Sut vs. NeuT;Apln <sup>-/-</sup> Sut; 2 weeks               | 0.0437  |
|             | NeuT;Apln <sup>+/+</sup> Sut vs. NeuT;Apln <sup>-/-</sup> Sut; 4 weeks               | 0.0479  |
| Figure 6A   | NeuT;Apln <sup>+/+</sup> Ctrl vs. NeuT;Apln <sup>+/+</sup> Sut                       | 0.0006  |
|             | NeuT;Apln <sup>+/+</sup> Sut vs. NeuT;Apln <sup>-/-</sup> Ctrl                       | 0.0101  |
|             | NeuT;Apln <sup>+/+</sup> Sut vs. NeuT;Apln <sup>-/-</sup> Sut                        | 0.0011  |
| Figure 6B   | Low APLN vs. high APLN                                                               | 0.0099  |
| Figure 6C   | Low APLN vs. high APLN                                                               | 0.0367  |
| Figure 6D   | Low APLN/ Low VEGF vs. Low APLN/High VEGF                                            | 0.0356  |
|             | Low APLN/ Low VEGF vs. High APLN/Low VEGF                                            | 0.0085  |
|             | Low APLN/ Low VEGF vs. High APLN/High VEGF                                           | 0.0070  |
| Figure EV1A | Low APLN vs. high APLN                                                               | 0.005   |
| Figure EV1C | NeuT;Apln <sup>+/+</sup> vs. NeuT;Apln <sup>-/-</sup>                                | 0.0019  |
| Figure EV1D | NeuT;Apln <sup>+/+</sup> vs. NeuT;Apln <sup>-/-</sup>                                | 0.00235 |
| Figure EV1E | Low APLN vs. high APLN                                                               | 0.0019  |
| Figure EV1F | KRas;Apln <sup>+/y</sup> vs. KRas;Apln <sup>-/y</sup>                                | 0.0037  |
| Figure EV1G | p53f/f;KRas;Apln <sup>+/y</sup> vs. p53f/f;KRas;Apln <sup>-/y</sup>                  | 0.0035  |
| Figure EV1H | KRas;Apln <sup>+/y</sup> vs. KRas;Apln <sup>-/y</sup> ; Adenoma                      | 0.0117  |
|             | KRas;Apln <sup>+/y</sup> vs. KRas;Apln <sup>-/y</sup> ; Hyperplasia                  | 0.2156  |
| Figure EV2A | NeuT;Apln <sup>+/+</sup> mamm tumor vs. Apln <sup>+/+</sup> mamm. Gland              | 0.0017  |
| Figure EV2B | E0771 shRenilla vs. E0771 shApln; Apln mRNA                                          | 0.0035  |
|             | E0771 shRenilla vs. E0771 shAplnr; Aplnr mRNA                                        | 0.005   |
| Figure EV2E | E0771 shApln vs. E0771 shAplnr; Day 18                                               | 0.0269  |
|             | E0771 shRen vs. E0771 shApln; Day 22                                                 | 0.0004  |
|             | E0771 shApln vs. E0771 shAplnr; Day 22                                               | <0.0001 |
| Figure EV2F | E0771 shRen vs. E0771 shApln                                                         | 0.0087  |
|             | E0771 shApln vs. E0771 shAplnr                                                       | 0.0351  |
| Figure EV4A | Apln <sup>+/+</sup> shRen Ctrl vs. Apln <sup>-/-</sup> shApln Ctrl; Day 25           | 0.0006  |
|             | Apln <sup>+/+</sup> shRen Ctrl vs. Apln <sup>+/+</sup> shRen Sut; Day 25             | <0.0001 |
|             | Apln <sup>+/+</sup> shRen Ctrl vs. Apln <sup>-/-</sup> shApln Sut; Day 25            | <0.0001 |

|             |                                                            |         |
|-------------|------------------------------------------------------------|---------|
|             | Apln+/+ shRen Ctrl vs. Apln-/- shApln Ctrl; Day 28         | <0.0001 |
|             | Apln+/+ shRen Ctrl vs. Apln+/+ shRen Sut; Day 28           | <0.0001 |
|             | Apln+/+ shRen Ctrl vs. Apln-/- shApln Sut; Day 28          | <0.0001 |
|             | Apln-/- shApln Ctrl vs. Apln-/- shApln Sut; Day 28         | 0.0014  |
|             | Apln-/- shApln Ctrl vs. Apln-/- shApln Sut; Day 32         | 0.0124  |
|             | Apln-/- shApln Ctrl vs. Apln+/+ shRen Sut; Day 36          | 0.0064  |
|             | Apln-/- shApln Ctrl vs. Apln-/- shApln Sut; Day 36         | 0.0002  |
|             | Apln+/+ shRen Sut vs. Apln-/- shApln Sut; Day 43           | 0.0479  |
| Figure EV4B | Apln+/+ shRen Ctrl vs. Apln-/- shApln Axitinib; Day 14     | 0.0110  |
|             | Apln+/+ shRen Ctrl vs. Apln+/+ shRen Axitinib; Day 18      | 0.0025  |
|             | Apln+/+ shRen Ctrl vs. Apln-/- shApln Axitinib; Day 18     | <0.0001 |
|             | Apln+/+ shRen Ctrl vs. Apln-/- shApln Ctrl; Day 21         | 0.0004  |
|             | Apln+/+ shRen Ctrl vs. Apln+/+ shRen Axitinib; Day 21      | <0.0001 |
|             | Apln+/+ shRen Ctrl vs. Apln-/- shApln Axitinib; Day 21     | <0.0001 |
|             | Apln-/- shApln Ctrl vs. Apln-/- shApln Axitinib; Day 21    | 0.0001  |
|             | Apln+/+ shRen Axitinib vs. Apln-/- shApln Axitinib; Day 21 | 0.0094  |
| Figure EV4C | Apln+/+ shRen Ctrl vs. Apln-/- shApln a-VEGF; Day 19       | 0.0091  |
|             | Apln+/+ shRen Ctrl vs. Apln+/+ shRen a-VEGF; Day 22        | 0.0055  |
|             | Apln-/- shApln Ctrl vs. Apln-/- shApln a-VEGF; Day 22      | 0.0047  |
|             | Apln+/+ shRen Ctrl vs. Apln-/- shApln a-VEGF; Day 22       | <0.0001 |
| Figure EV4D | NeuT;Apln+/+ Ctrl vs. NeuT;Apln-/- Sut                     | 0.0023  |
| Figure EV5A | NeuT;Apln+/+ Ctrl vs. NeuT;Apln+/+ Sut                     | <0.0001 |
|             | NeuT;Apln-/- Ctrl vs. NeuT;Apln+/+ Sut                     | <0.0001 |
|             | NeuT;Apln+/+ Sut vs. NeuT;Apln-/- Sut                      | 0.0001  |
| Figure EV5B | E0771 shRen Ctrl vs. E0771 shRen Sut                       | <0.0001 |
|             | E0771 shApln Ctrl vs. E0771 shRen Sut                      | <0.0001 |
|             | E0771 shRen Sut vs. E0771 shApln Sut                       | <0.0001 |
| Figure EV5C | Apln+/+ shRen Ctrl vs. Apln+/+ shRen Sut                   | <0.0001 |
|             | Apln-/- shApln Ctrl vs. Apln+/+ shRen Sut                  | <0.0001 |
|             | Apln+/+ shRen Sut vs. Apln-/- shApln Sut                   | <0.0001 |
| Figure S1A  | NeuT;Apln+/+ vs. NeuT;Apln-/-                              | 0.0027  |
| Figure S1B  | KRas;Apln+/y vs. KRas;Apln-/y                              | 0.0143  |
| Figure S2A  | p53f/f;KRas;Apln+/y Ctrl vs. p53f/f;KRas;Apln-/y Ctrl      | 0.0010  |
|             | p53f/f;KRas;Apln+/y Ctrl vs. p53f/f;KRas;Apln+/y Sut       | <0.0001 |
|             | p53f/f;KRas;Apln+/y Ctrl vs. p53f/f;KRas;Apln-/y Sut       | <0.0001 |
|             | p53f/f;KRas;Apln-/y Ctrl vs. p53f/f;KRas;Apln-/y Sut       | 0.0011  |
|             | p53f/f;KRas;Apln+/y Sut vs. p53f/f;KRas;Apln-/y Sut        | 0.0376  |
| Figure S2B  | p53f/f;KRas;Apln+/y Ctrl vs. p53f/f;KRas;Apln+/y Sut       | 0.0190  |
|             | p53f/f;KRas;Apln+/y Ctrl vs. p53f/f;KRas;Apln-/y Sut       | <0.0001 |
|             | p53f/f;KRas;Apln-/y Ctrl vs. p53f/f;KRas;Apln-/y Sut       | 0.0070  |
| Figure S2C  | p53f/f;KRas;Apln+/y Ctrl vs. p53f/f;KRas;Apln-/y Sut       | <0.0001 |
|             | p53f/f;KRas;Apln-/y Ctrl vs. p53f/f;KRas;Apln-/y Sut       | 0.0002  |
|             | p53f/f;KRas;Apln+/y Sut vs. p53f/f;KRas;Apln-/y Sut        | <0.0001 |
