# Supplementary material for: Apelin inhibition prevents resistance and metastasis associated with anti‐angiogenic therapy
Source: PubMed Central journal article supplement (PMC6685079; doi:10.15252/emmm.201809266), 2019-06-24
Supplement: EMMM-11-e9266-s004.pdf [file EMMM-11-e9266-s004.pdf]

| Figure 1A                      |                          |
|--------------------------------|--------------------------|
| Survival after tumor onset [d] |                          |
| NeuT;Apln <sup>+/+</sup>       | NeuT;Apln <sup>-/-</sup> |
| 40                             | 70                       |
| 70                             | 69                       |
| 80                             | 59                       |
| 54                             | 65                       |
| 54                             | 85                       |
| 60                             | 55                       |
| 30                             | 65                       |
| 66                             | 85                       |
| 33                             | 65                       |
| 43                             | 91                       |
| 46                             |                          |
