# Supplementary material for: Apelin inhibition prevents resistance and metastasis associated with anti‐angiogenic therapy
Source: PubMed Central journal article supplement (PMC6685079; doi:10.15252/emmm.201809266), 2019-06-24
Supplement: EMMM-11-e9266-s005.pdf [file EMMM-11-e9266-s005.pdf]

Figure 3A

Survival after tumor onset [d]

| NeuT;Apln <sup>+/+</sup> + Sunitinib | NeuT;Apln <sup>-/-</sup> + Sunitinib | NeuT;Apln <sup>+/+</sup> | NeuT;Apln <sup>-/-</sup> |
|--------------------------------------|--------------------------------------|--------------------------|--------------------------|
| 69                                   | 163                                  | 46                       | 41                       |
| 55                                   | 69                                   | 38                       | 55                       |
| 71                                   | 110                                  | 50                       | 55                       |
| 41                                   | 57                                   | 23                       | 132                      |
| 94                                   | 120                                  | 82                       | 45                       |
| 68                                   | 89                                   | 71                       | 86                       |
| 55                                   | 113                                  | 33                       | 65                       |
| 55                                   | 101                                  | 38                       | 80                       |
| 117                                  | 50                                   |                          | 101                      |
| 117                                  | 179                                  |                          | 99                       |
| 110                                  | 131                                  |                          | 81                       |
|                                      | 128                                  |                          |                          |
