# Supplementary material for: Apelin inhibition prevents resistance and metastasis associated with anti‐angiogenic therapy
Source: PubMed Central journal article supplement (PMC6685079; doi:10.15252/emmm.201809266), 2019-06-24
Supplement: EMMM-11-e9266-s006.pdf [file EMMM-11-e9266-s006.pdf]

| Figure 6c                                           |          |
|-----------------------------------------------------|----------|
| Progression-free survival after sunitinib treatment |          |
| High APLN                                           | Low APLN |
| 102                                                 | 709      |
| 570                                                 | 463      |
| 133                                                 | 143      |
| 82                                                  | 379      |
| 629                                                 | 203      |
| 572                                                 | 1140     |
| 162                                                 | 540      |
| 462                                                 | 691      |
| 338                                                 | 708      |
| 706                                                 | 132      |
| 172                                                 | 240      |
| 460                                                 | 391      |
| 236                                                 | 222      |
| 748                                                 | 623      |
| 280                                                 | 456      |
| 158                                                 | 623      |
| 450                                                 | 660      |
| 138                                                 | 331      |
| 343                                                 | 846      |
| 799                                                 | 350      |
| 383                                                 | 120      |
| 160                                                 | 534      |
| 37                                                  | 154      |
| 83                                                  | 185      |
| 273                                                 | 674      |
| 116                                                 | 1257     |
| 525                                                 | 288      |
|                                                     | 793      |

Figure 6d

## Progression-free survival after sunitinib treatment

| Low APLN/ Low VEGF | Low APLN/ High VEGF | High APLN/ Low VEGF | High APLN/ High VEGF |
|--------------------|---------------------|---------------------|----------------------|
| 222                | 143                 | 450                 | 162                  |
| 456                | 288                 | 160                 | 460                  |
| 240                | 674                 | 280                 | 158                  |
| 534                | 379                 | 338                 | 82                   |
| 623                | 793                 | 383                 | 748                  |
| 691                | 708                 | 138                 | 102                  |
| 1257               | 203                 | 116                 | 37                   |
| 1140               | 350                 | 572                 | 172                  |
| 540                | 120                 | 525                 | 570                  |
| 846                | 185                 | 343                 | 133                  |
| 660                | 463                 | 273                 | 799                  |
| 623                | 391                 | 462                 | 236                  |
|                    | 331                 | 83                  |                      |
|                    | 132                 | 629                 |                      |
|                    | 154                 | 706                 |                      |
|                    | 709                 |                     |                      |
